# Supplementary material for: Synthesis and structure of nitrogen bridged calix[5]- and -[10]-pyridines and their complexation with fullerenes
Source: Royal Society of Chemistry journal article supplement (doi:10.1039/b705595a), 2007-01-01
Supplement: b705595a.pdf [file b705595a.pdf]

## Supporting Information

# Synthesis and structure of nitrogen bridged calix[5]- and -[10]-pyridines and their complexation with fullerenes

*Shi-Qiang Liu, De-Xian Wang, Qi-Yu Zheng and Mei-Xiang Wang\**

**Preparation of 3.** To a solution of 2,6-bis(methylamino)pyridine **1** (1.37 g, 10 mmol), 2,6-dibromopyridine **2** (4.47 g, 20 mmol) in dry THF (100 mL) at room temperature was added rapidly KOBu<sup>t</sup> (3.36 g, 30 mmol). An exothermal reaction took place immediately and the mixture became a dark red solution. About 10 min later, the solution was heated to reflux. After 2 h, the reaction mixture was cooled down to room temperature and water (10 mL) was added. The precipitate was filtrated off and washed with ethyl acetate. The filtrate was concentrated under vacuum to remove THF. The residue was dissolved in water (30 mL) and extracted with ethyl acetate (3×20 mL). After dry over with anhydrous Mg<sub>2</sub>SO<sub>4</sub> and concentration under vacuum, the residue was chromatographed on a silica gel column to give compound **3** (3.91 g, 75%).

**Preparation of 5.** To a solution of 2,6-bis(methylamino)pyridine **1** (1.37 g, 10 mmol), 2,6-dibromopyridine **2** (2.25 g, 9.5 mmol) in dry THF (30 mL) at 30 °C was added drop-wise a solution of KOBu<sup>t</sup> (2.22 g, 20 mmol) in dry THF (10 mL). The resulting mixture was kept stirring at 50 °C for 1 h, and then the reaction was quenched by cooling to room temperature and by adding water (10 mL). The mixture was concentrated under vacuum to remove THF and the residue was dissolved in water

(20 mL) and extracted with ethyl acetate (3×20 mL). After dry over with anhydrous Mg<sub>2</sub>SO<sub>4</sub> and concentration under vacuum, the residue was chromatographed on a silica gel column using a mixture of ethyl acetate and petroleum ether (1:5) as an eluent to give compound **4** (1.032 g, 71%): mp 91-92 °C; IR (KBr) 3384, 3265, 1607, 1573 cm<sup>-1</sup>; <sup>1</sup>H NMR (CDCl<sub>3</sub>, 300 MHz) δ 7.39 (t, *J* = 7.9 Hz, 1H), 7.22 (t, *J* = 7.9 Hz, 1H), 7.12 (d, *J* = 7.4 Hz, 1H), 6.87 (d, *J* = 8.3 Hz, 1H), 6.43 (d, *J* = 8.3 Hz, 1H), 6.07 (d, *J* = 7.3 Hz, 1H), 4.50 (s, 1H), 3.53 (s, 3H), 2.88 (d, *J* = 5.1 Hz, 3H); <sup>13</sup>C NMR (CDCl<sub>3</sub>, 75MHz) δ. 158.9, 157.8, 156.2, 139.5, 139.1, 138.2, 118.3, 111.4, 103.9, 100.4, 35.9, 29.1. C<sub>12</sub>H<sub>13</sub>N<sub>4</sub>Br requires C, 49.16; H, 4.47; N, 19.11. Found: C, 49.21; H, 4.58; N, 18.94. A mixture of **4** (4.5 g, 15 mmol) and CuSO<sub>4</sub>·5H<sub>2</sub>O (0.2, 0.8 mmol) in aqueous methylamine solution (25-30%, 40 mL) was heated at 150 °C in a sealed tube for 15 h. After colling to room temperature, the mixture was added into a saturated NaOH solution in water (20 mL) and product **5** precipitated. Filtration, wash with water, and dry under vacuum gave pure **5** (3.235 g, 87%): mp 108-110 °C; IR (KBr) 3298, 3177, 1602, 1571 cm<sup>-1</sup>; <sup>1</sup>H NMR (CDCl<sub>3</sub>, 300 MHz) δ 7.29 (t, *J* = 7.8 Hz, 2H), 6.47 (d, *J* = 7.9 Hz, 2H), 5.93 (d, *J* = 7.9 Hz, 2H), 4.36 (br., s, 2H), 3.51 (s, 3H), 2.89 (d, *J* = 5.1 Hz, 6H); <sup>13</sup>C NMR (CDCl<sub>3</sub>, 75MHz) δ. 158.8, 157.1, 138.3, 103.1, 97.6, 35.5, 29.2; MS (ESI) *m/z* 244 (M+H<sup>+</sup>). C<sub>13</sub>H<sub>17</sub>N<sub>5</sub> requires C, 64.17; H, 7.04; N, 28.78. Found: C, 64.17; H 7.04; N 28.53.

**Synthesis of azacalix[5]pyridine 6 and azacalix[10]pyridine 7.** Under argon protection, a mixture of **3** (224 mg, 0.5 mmol), **5** (122 mg, 0.5 mmol), KOBu<sup>t</sup> (144 mg, 1.5 mmol), Pd<sub>2</sub>(dba)<sub>3</sub> (92 mg, 0.1 mmol), dppp (82 mg, 0.2 mmol) in dry

1,4-dioxane (200 mL) was heated rapid to reflux. After refluxing for 4 h, the mixture was cooled to room temperature, and water (10 mL) was added. The solid in the mixture was filtrated off through Celite. The filtrate was concentrated to give a residue (5 mL) which was dissolved in water (50 mL) and extracted with dichloromethane (3×30 mL). The combined organic phase was washed with brine (50 mL). The aqueous phase was extracted again with dichloromethane (30 mL). Combined organic phase was dried over with anhydrous Mg<sub>2</sub>SO<sub>4</sub>. After the solvent was removed under vacuum, the residue was chromatographed on a silica gel column eluted with a mixture of ethyl acetate and petroleum ether (1:3), pure ethyl acetate and then a mixture of ethyl acetate, methanol and ammonium (2000:100:1) to give products **6** and **7** (Table 1). Azacalix[5]pyridine **6** (62 mg, 23%): mp 225-227 °C; IR (KBr) 1739 (w) 1587 (sh) 1566 cm<sup>-1</sup>; <sup>1</sup>H NMR (CDCl<sub>3</sub>, 300 MHz) δ 7.36 (t, 1H *J* = 8.0 Hz), 6.74 (d, 2H, *J* = 8.0 Hz), 3.53 (s, 3H); <sup>13</sup>C NMR (CDCl<sub>3</sub>, 75MHz) δ 156.2, 137.8, 106.7, 35.8; MS (MALDI-TOF) *m/z* 531(M+H<sup>+</sup>), 553 (M+Na<sup>+</sup>), 569 (M+K<sup>+</sup>). C<sub>30</sub>H<sub>30</sub>N<sub>10</sub> requires: C, 67.90; H, 5.70; N, 26.40. Found: C, 67.85; H, 5.72; N, 26.16. Azacalix[10]pyridine **7** (91 mg, 34.3%): mp 188-190 °C; IR (KBr) 1591, 1563 cm<sup>-1</sup>; <sup>1</sup>H NMR (CDCl<sub>3</sub>, 300MHz) δ 7.39 (t, 1H, *J* = 8.0 Hz), 6.78 (d, 2H, *J* = 8.0 Hz), 3.59 (s, 3H); <sup>13</sup>C NMR (CDCl<sub>3</sub>, 75MHz) δ 156.1, 137.8, 106.6, 35.8; MS (MALDI-TOF) *m/z* 1060 (M<sup>+</sup>). C<sub>60</sub>H<sub>60</sub>N<sub>20</sub> requires C, 67.90; H, 5.70; N, 26.40. Found: C, 67.93; H, 5.77; N, 26.22.

**Table S1** Macrocyclizative coupling reaction between **3** and **5**<sup>a</sup>

| entry             | catalyst                           | ligand             | base                            | <b>6</b> (%) <sup>b</sup> | <b>7</b> (%) <sup>b</sup> |
|-------------------|------------------------------------|--------------------|---------------------------------|---------------------------|---------------------------|
| 1                 | CuI                                | DMGC <sup>c</sup>  | Cs <sub>2</sub> CO <sub>3</sub> | -                         | -                         |
| 2                 | Cu <sub>2</sub> O                  | oxime <sup>d</sup> | Cs <sub>2</sub> CO <sub>3</sub> | -                         | -                         |
| 3                 | Pd(OAc) <sub>2</sub>               | dppp               | NaOBu <sup>t</sup>              | -                         | -                         |
| 4                 | Pd <sub>2</sub> (dba) <sub>3</sub> | dppf               | NaOBu <sup>t</sup>              | 7.9                       | 16.2                      |
| 5                 | Pd <sub>2</sub> (dba) <sub>3</sub> | dppb               | NaOBu <sup>t</sup>              | 12.4                      | 18.5                      |
| 6                 | Pd <sub>2</sub> (dba) <sub>3</sub> | dppe               | NaOBu <sup>t</sup>              | 16.2                      | 23.8                      |
| 7                 | Pd <sub>2</sub> (dba) <sub>3</sub> | dppp               | NaOBu <sup>t</sup>              | 23.0                      | 34.3                      |
| 8 <sup>e</sup>    | Pd <sub>2</sub> (dba) <sub>3</sub> | dppp               | NaOBu <sup>t</sup>              | 25.7                      | 18.9                      |
| 9 <sup>e,f</sup>  | Pd <sub>2</sub> (dba) <sub>3</sub> | dppp               | NaOBu <sup>t</sup>              | 30.9                      | 4.5                       |
| 10 <sup>f,g</sup> | Pd <sub>2</sub> (dba) <sub>3</sub> | dppp               | NaOBu <sup>t</sup>              | 8.5                       | 41.6                      |

<sup>a</sup> A mixture of **3** (1 Mmol), **5** (1 Mmol), catalyst (20%), ligand (40%), base (3 mmol) was refluxed in 1,4-dioxane (mL) for 4 h. <sup>b</sup> Isolated yield. <sup>c</sup> *N,N*-dimethylglycine. <sup>d</sup> salicylaldoxime. <sup>e</sup> The concentration of the reactants was halved. <sup>f</sup> The reaction was carried out at 110 °C in *N,N*-dimethylacetamide. <sup>g</sup> The concentration of the reactants was increased by 4 folds.

**Table S2** Selected bond lengths [ $\text{\AA}$ ] and angles [ $^\circ$ ] of **6**:

|                  |       |                  |       |
|------------------|-------|------------------|-------|
| N(2)–C(5)        | 1.391 | N(2)–C(6)        | 1.428 |
| N(2)–C(26)       | 1.478 | N(4)–C(10)       | 1.400 |
| N(4)–C(11)       | 1.434 | N(4)–C(27)       | 1.470 |
| N(6)–C(15)       | 1.423 | N(6)–C(16)       | 1.403 |
| N(6)–C(28)       | 1.482 | N(8)–C(20)       | 1.399 |
| N(8)–C(21)       | 1.424 | N(8)–C(29)       | 1.464 |
| N(10)–C(25)      | 1.404 | N(10)–C(30)      | 1.471 |
| N(10)–C(1)       | 1.414 |                  |       |
| C(5)–N(2)–C(26)  | 118.1 | C(5)–N(2)–C(6)   | 123.7 |
| C(6)–N(2)–C(26)  | 116.9 | C(10)–N(4)–C(11) | 122.0 |
| C(15)–N(6)–C(16) | 123.6 | C(20)–N(8)–C(21) | 118.5 |
| C(25)–N(10)–C(1) | 122.4 |                  |       |

**Table S3** Selected bond lengths [Å] and angles [°] of **7**:

|                   |       |                  |       |
|-------------------|-------|------------------|-------|
| N(10)–C(29)       | 1.391 | N(10)–C(30)      | 1.458 |
| N(10)–C(1)        | 1.408 | N(8)–C(25)       | 1.385 |
| N(8)–C(23)        | 1.411 | N(8)–C(24)       | 1.454 |
| N(6)–C(19)        | 1.402 | N(6)–C(17)       | 1.391 |
| N(6)–C(18)        | 1.451 | N(4)–C(13)       | 1.388 |
| N(4)–C(11)        | 1.393 | N(4)–C(12)       | 1.437 |
| N(2)–C(7)         | 1.432 | N(2)–C(5)        | 1.374 |
| N(2)–C(6)         | 1.422 |                  |       |
| C(29)–N(10)–C(30) | 117.8 | C(1)–N(10)–C(29) | 124.2 |
| C(30)–N(10)–C(1)  | 117.9 | C(25)–N(8)–C(23) | 123.5 |
| C(19)–N(6)–C(17)  | 123.6 | C(13)–N(4)–C(11) | 122.9 |
| C(7)–N(2)–C(5)    | 120.9 |                  |       |

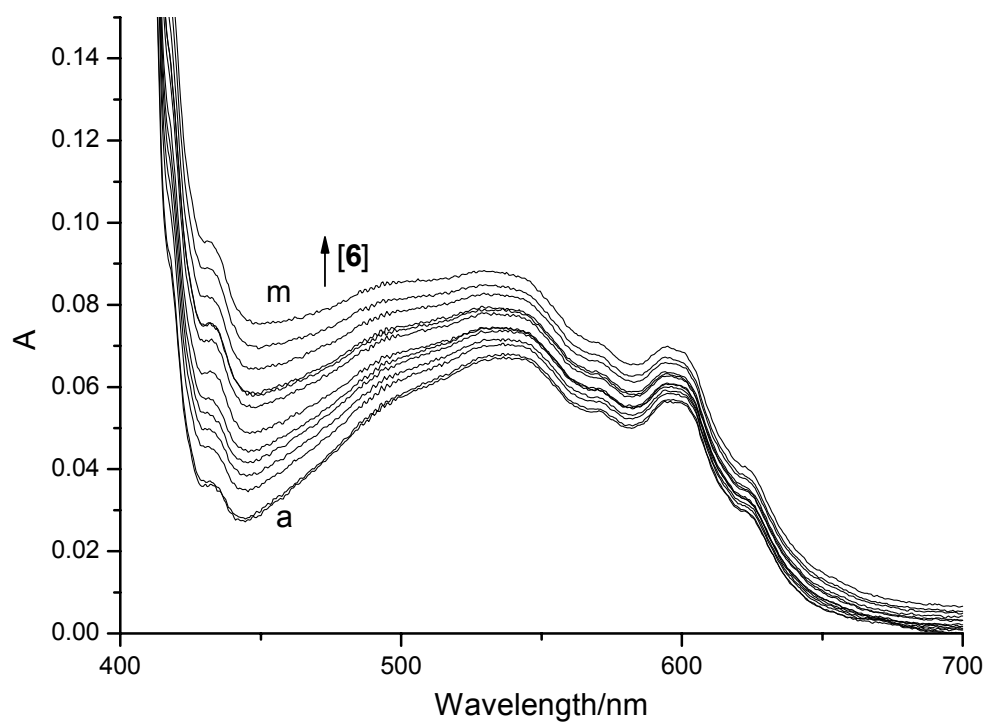

**Figure S1.** Absorption spectra of C<sub>60</sub> ( $7.992 \times 10^{-5}$  mol dm<sup>-3</sup>) in the presence of **6** in toluene at 25 °C. The concentrations of **6** for curves a-m (from bottom to top) are: 0, 0.080, 0.160, 0.240, 0.320, 0.400, 0.480, 0.560, 0.640, 0.720, 0.80, 0.960, 1.12 ( $\times 10^{-4}$  mol dm<sup>-3</sup>).

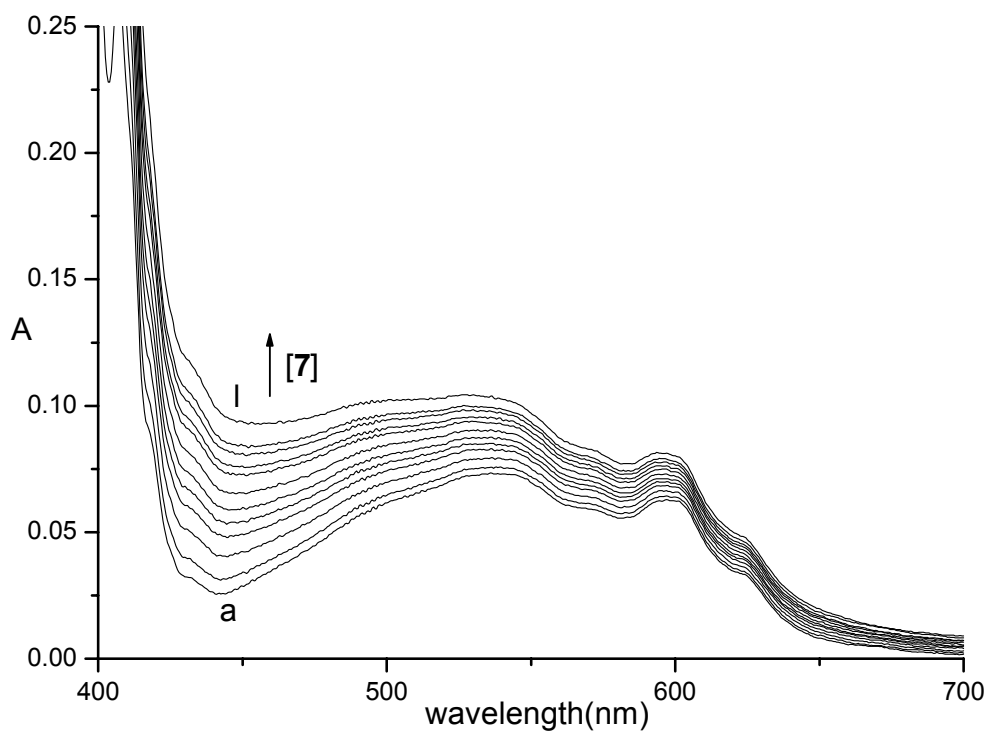

**Figure S2.** Absorption spectra of C<sub>60</sub> ( $7.99 \times 10^{-5} \text{ mol dm}^{-3}$ ) in the presence of **7** in toluene at 25 °C. The concentrations of **7** for curves a-1 (from bottom to top) are: 0, 0.080, 0.159, 0.240, 0.320, 0.400, 0.480, 0.560, 0.640, 0.720, 0.800, 1.04 ( $\times 10^{-4} \text{ mol dm}^{-3}$ ).



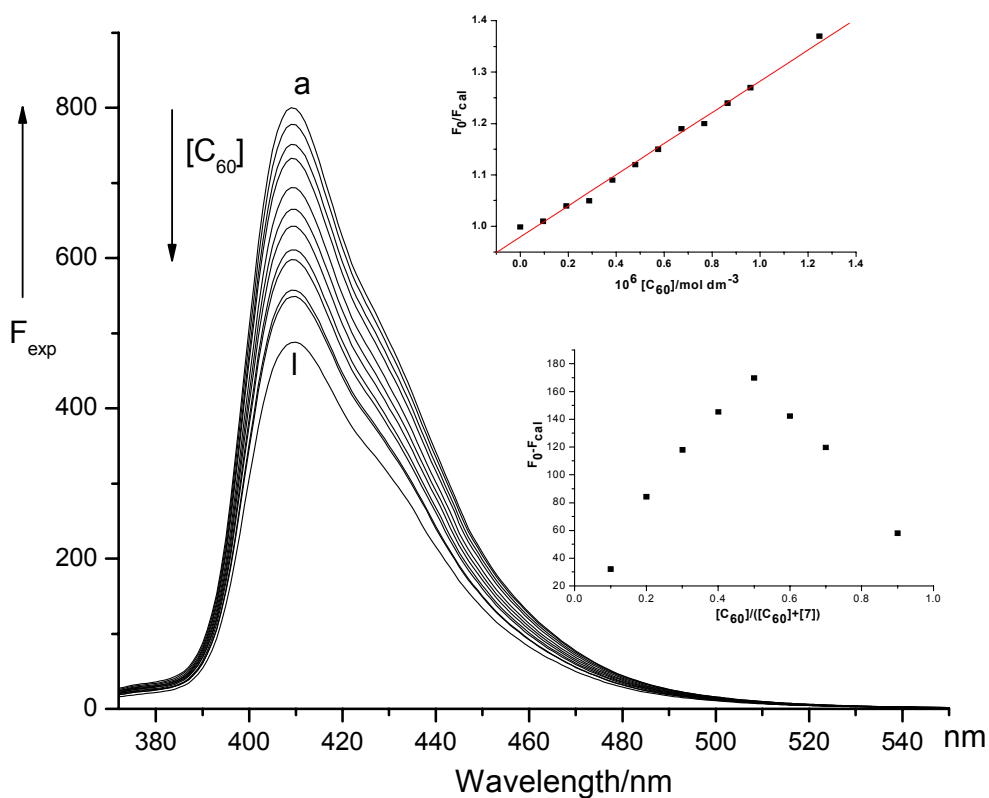

**Figure S3.** Emission spectra ( $\lambda_{\text{ex}}=352$  nm) of **7** ( $3.2 \times 10^{-6}$  mol  $\text{dm}^{-3}$ ) in the presence of  $\text{C}_{60}$  in toluene at 25°C. The concentrations of  $\text{C}_{60}$  for curves a-l (from top to bottom) are 0, 0.096, 0.192, 0.288, 0.384, 0.480, 0.576, 0.672, 0.768, 0.864, 0.960, 1.25 ( $\times 10^{-5}$  mol  $\text{dm}^{-3}$ ). Insets: The up insert is the variation of fluorescence intensity  $F_0/F_{\text{cal}}$  of **7** with increasing  $\text{C}_{60}$  concentration. The down inset is the Job plot for **7**- $\text{C}_{60}$  complex in toluene solution ( $[\text{7}] + [\text{C}_{60}] = 6.4 \times 10^{-6}$  mol  $\text{dm}^{-3}$ ).

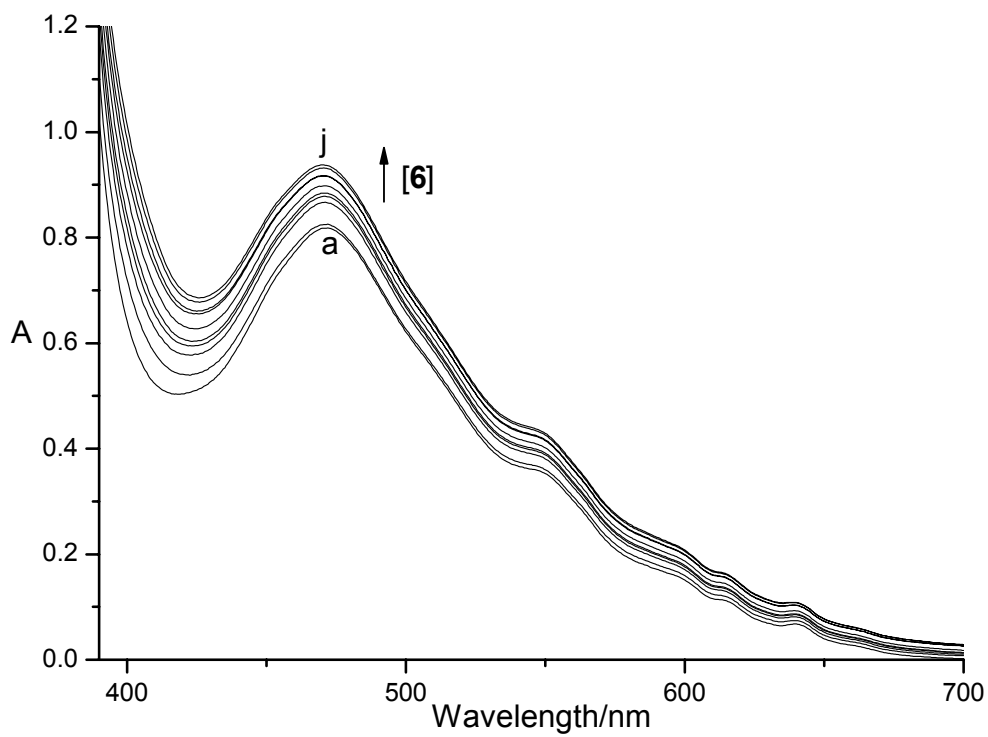

**Figure S4.** Absorption spectra of  $C_{70}$  ( $4.19 \times 10^{-5} \text{ mol dm}^{-3}$ ) in the presence of **6** in toluene at 25 °C. The concentrations of **6** for curves a-j (from bottom to top) are: 0, 0.240, 0.320, 0.400, 0.480, 0.560, 0.640, 0.720, 0.800, 0.880 ( $\times 10^{-4} \text{ mol dm}^{-3}$ ).

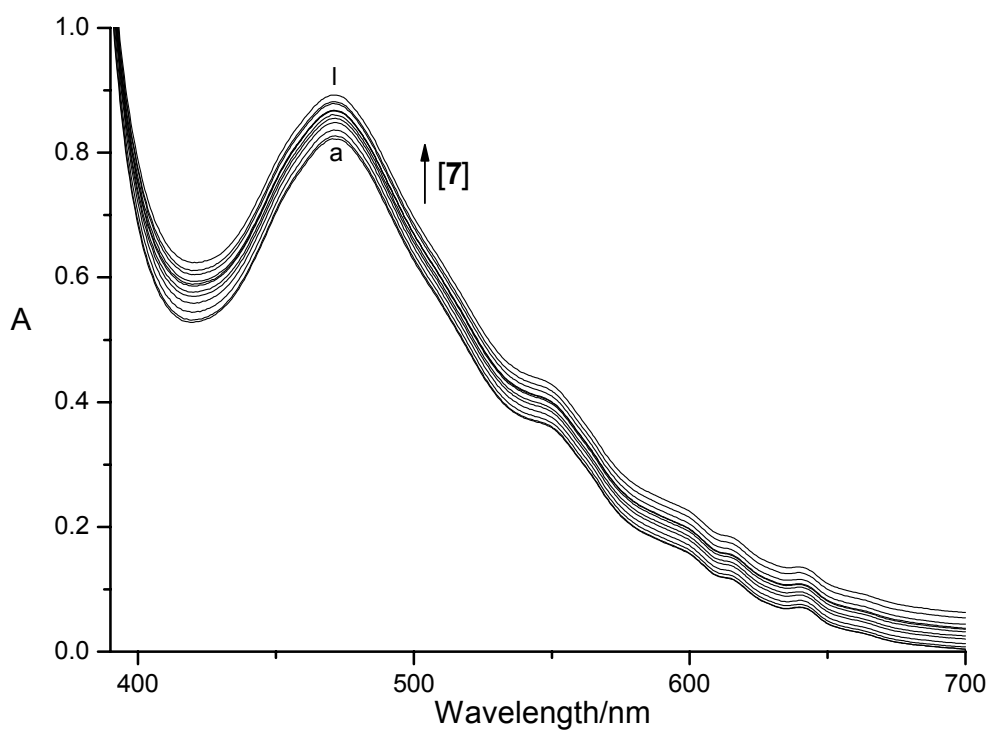

**Figure S5.** Absorption spectra of C<sub>70</sub> ( $4.0 \times 10^{-5}$  mol dm<sup>-3</sup>) in the presence of **7** in toluene at 25 °C. The concentrations of **7** for curves a-l (from bottom to top) are: 0, 0.196, 0.392, 0.588, 0.784, 0.981, 1.18, 1.37, 1.57, 1.76, 1.96, 2.16 ( $\times 10^{-5}$  mol dm<sup>-3</sup>).

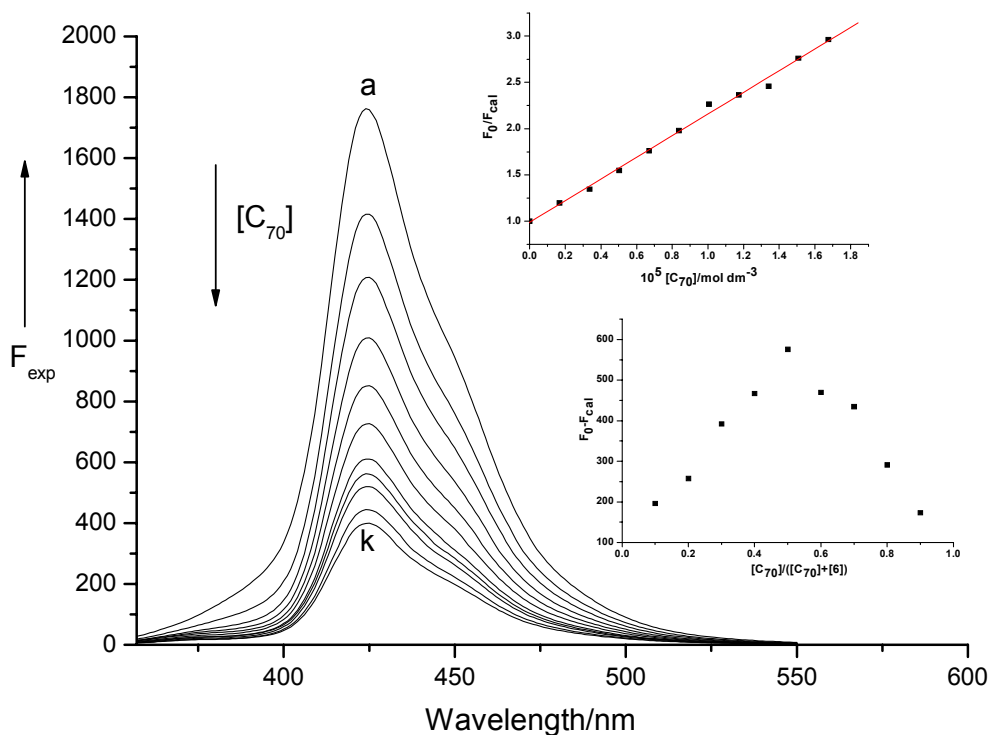

**Figure S6.** Emission spectra ( $\lambda_{\text{ex}}=336\text{ nm}$ ) of **6** ( $3.2\times 10^{-6}\text{ mol dm}^{-3}$ ) in the presence of  $C_{70}$  in toluene at  $25^\circ\text{C}$ . The concentrations of  $C_{70}$  for curves a-k (from top to bottom) are 0, 0.167, 0.335, 0.502, 0.670, 0.838, 1.01, 1.17, 1.34, 1.51, 1.68 ( $\times 10^{-5}\text{ mol dm}^{-3}$ ). Insets: The up inset is the variation of fluorescence intensity  $F_0/F_{\text{cal}}$  of **6** with increasing  $C_{70}$  concentration. The down inset is the Job plot for **6**- $C_{70}$  complex in toluene solution ( $[6]+[C_{70}]=6.4\times 10^{-6}\text{ mol dm}^{-3}$ ).

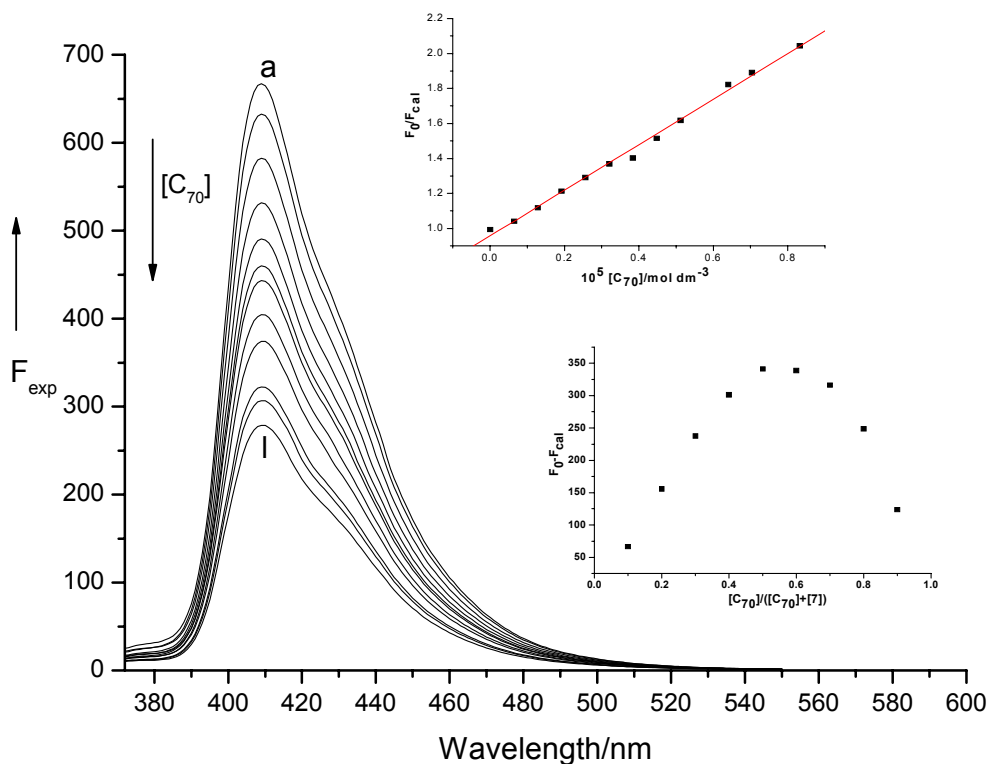

**Figure S7.** Emission spectra ( $\lambda_{\text{ex}} = 352\text{nm}$ ) of **7** ( $3.2 \times 10^{-6} \text{ mol dm}^{-3}$ ) in the presence of  $C_{70}$  in toluene at  $25^\circ\text{C}$ . The concentrations of  $C_{70}$  for curves a-l (from top to bottom) are 0, 0.064, 0.128, 0.192, 0.256, 0.320, 0.384, 0.448, 0.512, 0.640, 0.704, 0.832 ( $\times 10^{-5} \text{ mol dm}^{-3}$ ). Insets: The up inset is the variation of fluorescence intensity  $F_0/F_{\text{cal}}$  of **7** with increasing  $C_{70}$  concentration. The down inset is the Job plot for **7**- $C_{70}$  complex in toluene solution ( $[7] + [C_{70}] = 6.4 \times 10^{-6} \text{ mol dm}^{-3}$ ).

Supplementary Material (ESI) for Chemical Communications  
This journal is (c) The Royal Society of Chemistry 2007

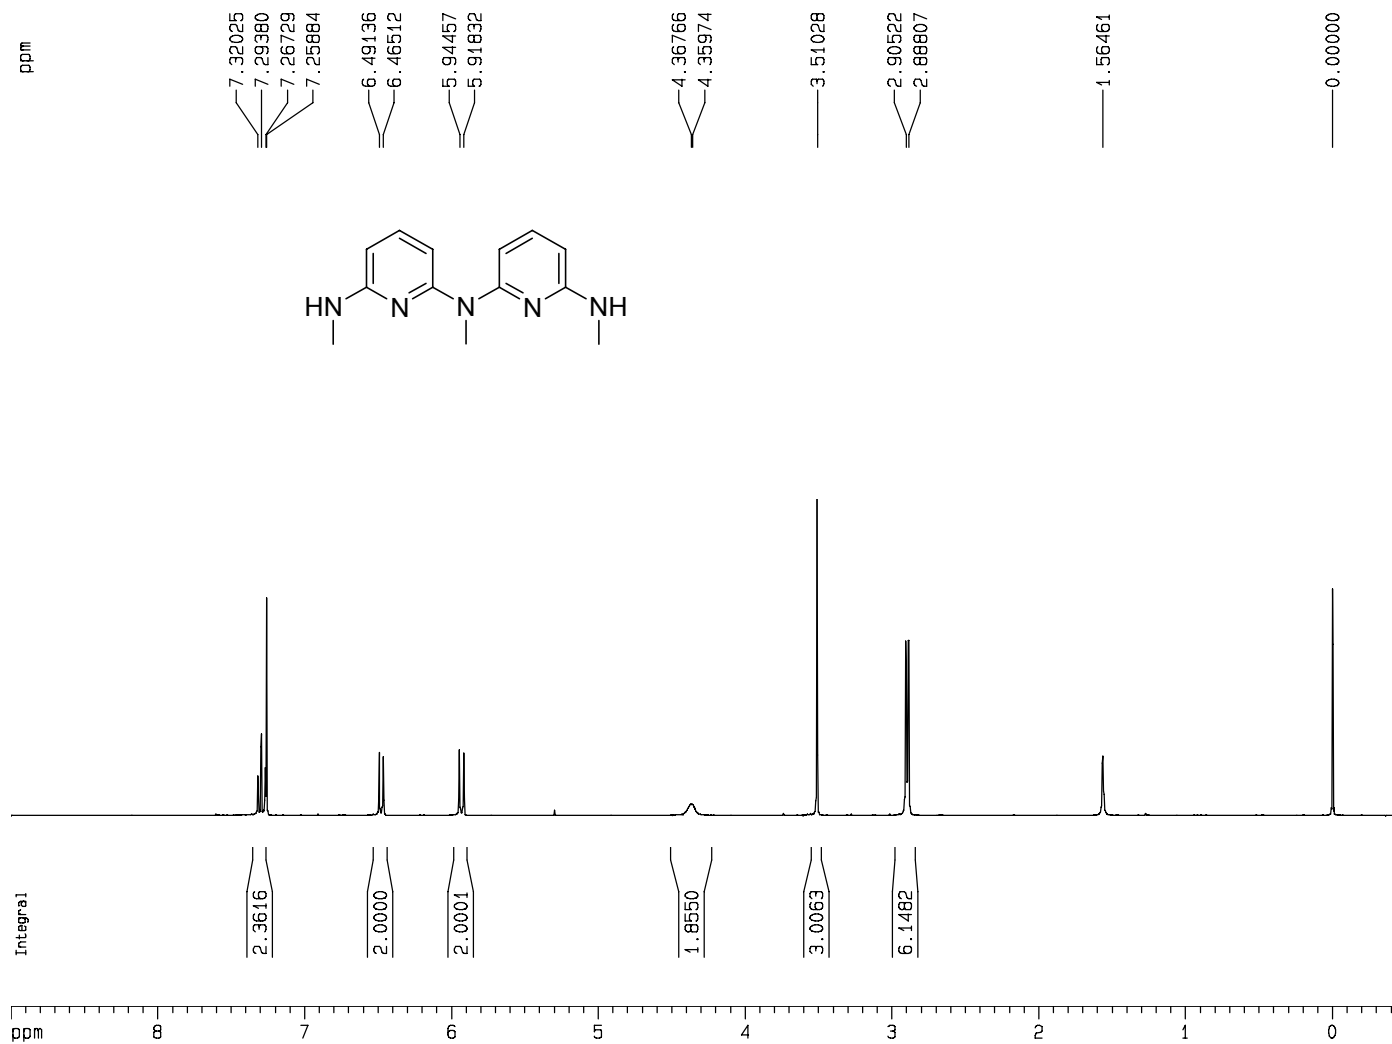

Current Data Parameters  
NAME lsq2-26321  
EXPNO 10  
PROCNO 1

F2 - Acquisition Parameters  
Date\_ 20060226  
Time 18.32  
INSTRUM av300  
PROBHD 5 mm DUL 13C-1  
PULPROG zg30  
TD 65536  
SOLVENT CDC13  
NS 16  
DS 2  
SWH 6172.839 Hz  
FIDRES 0.094190 Hz  
AQ 5.3084660 sec  
RG 574.7  
DW 81.000 usec  
DE 6.00 usec  
TE 297.0 K  
D1 2.00000000 sec

===== CHANNEL f1 =====  
NUC1 1H  
P1 9.30 usec  
PL1 -1.00 dB  
SFO1 300.1318534 MHz

F2 - Processing parameters  
SI 32768  
SF 300.1300066 MHz  
WDW EM  
SSB 0  
LB 0.30 Hz  
GB 0  
PC 1.00

1D NMR plot parameters  
CX 22.00 cm  
CY 5.00 cm  
F1P 9.000 ppm  
F1 2701.17 Hz  
F2P -0.500 ppm  
F2 -150.07 Hz  
PPMCM 0.43182 ppm/cm  
HZCM 129.60159 Hz/cm

Supplementary Material (ESI) for Chemical Communications  
This journal is (c) The Royal Society of Chemistry 2007

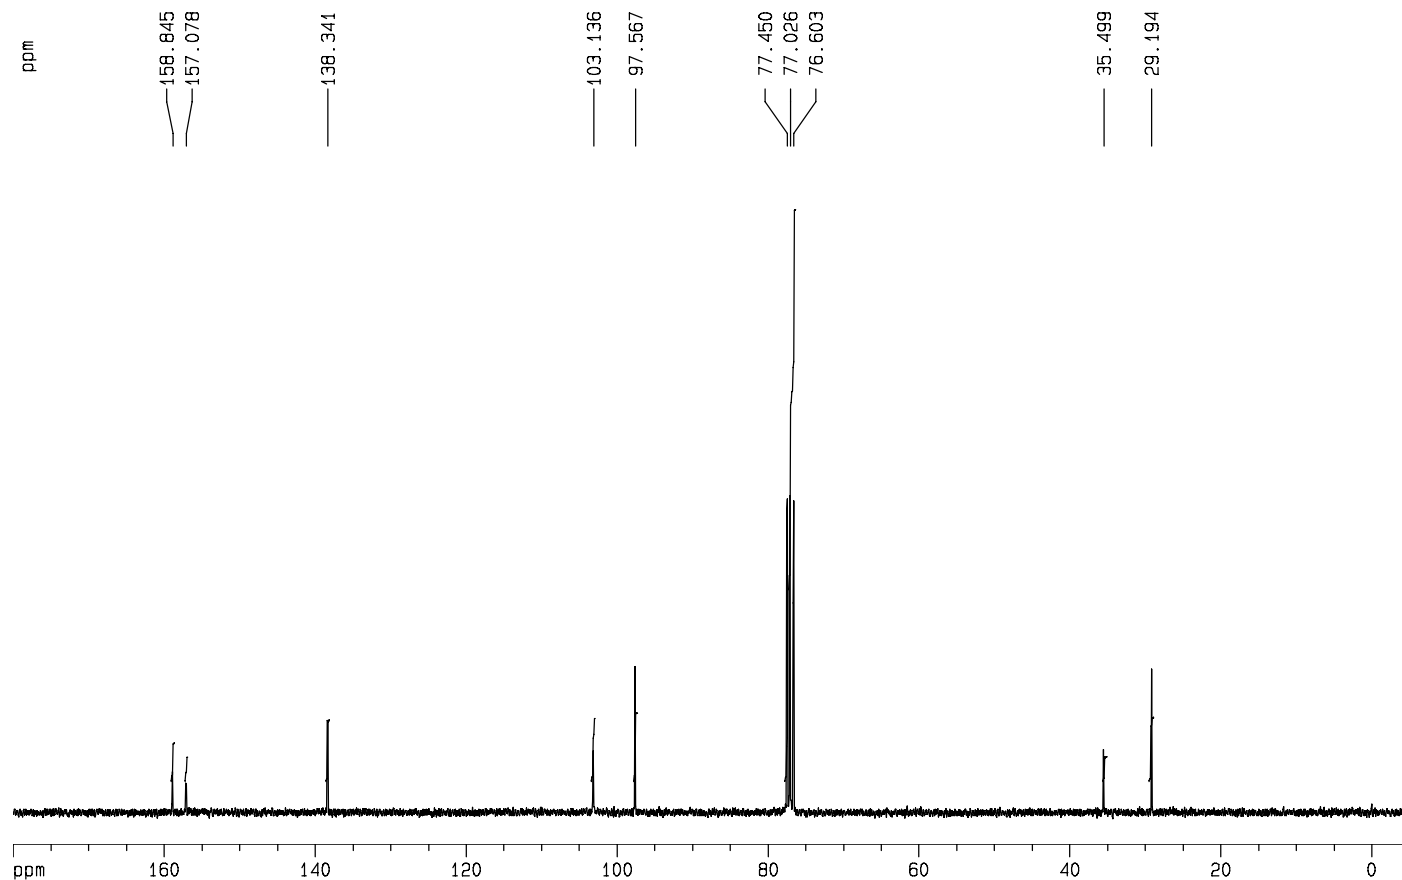

Current Data Parameters  
NAME 1sq7-3-14bd2  
EXPNO 10  
PROCNO 1

F2 - Acquisition Parameters  
Date\_ 20070314  
Time 14.28  
INSTRUM av300  
PROBHD 5 mm DUL 13C-1  
PULPROG zgpg30  
TD 65536  
SOLVENT CDCl3  
NS 486  
DS 4  
SWH 17985.611 Hz  
FIDRES 0.274439 Hz  
AQ 1.8219508 sec  
RG 406.4  
DW 27.800 usec  
DE 6.00 usec  
TE 298.5 K  
D1 2.00000000 sec  
d11 0.03000000 sec  
d12 0.0002000 sec

===== CHANNEL f1 =====  
NUC1 13C  
P1 9.40 usec  
PL1 -1.00 dB  
SF01 75.4752953 MHz

===== CHANNEL f2 =====  
CPDPRG2 waltz16  
NUC2 1H  
PCPD2 80.00 usec  
PL2 -1.00 dB  
PL12 18.00 dB  
PL13 18.00 dB  
SF02 300.1312005 MHz

F2 - Processing parameters  
SI 32768  
SF 75.4677490 MHz  
WDW EM  
SSB 0  
LB 1.00 Hz  
GB 0  
PC 1.40

f0 NMR plot parameters  
CX 22.00 cm  
CY 5.00 cm  
F1P 180.000 ppm  
F1 13584.20 Hz  
F2P -5.000 ppm  
F2 -377.34 Hz  
PPMCM 8.40909 ppm/cm  
HZCM 634.61517 Hz/cm

Supplementary Material (ESI) for Chemical Communications  
This journal is (c) The Royal Society of Chemistry 2007

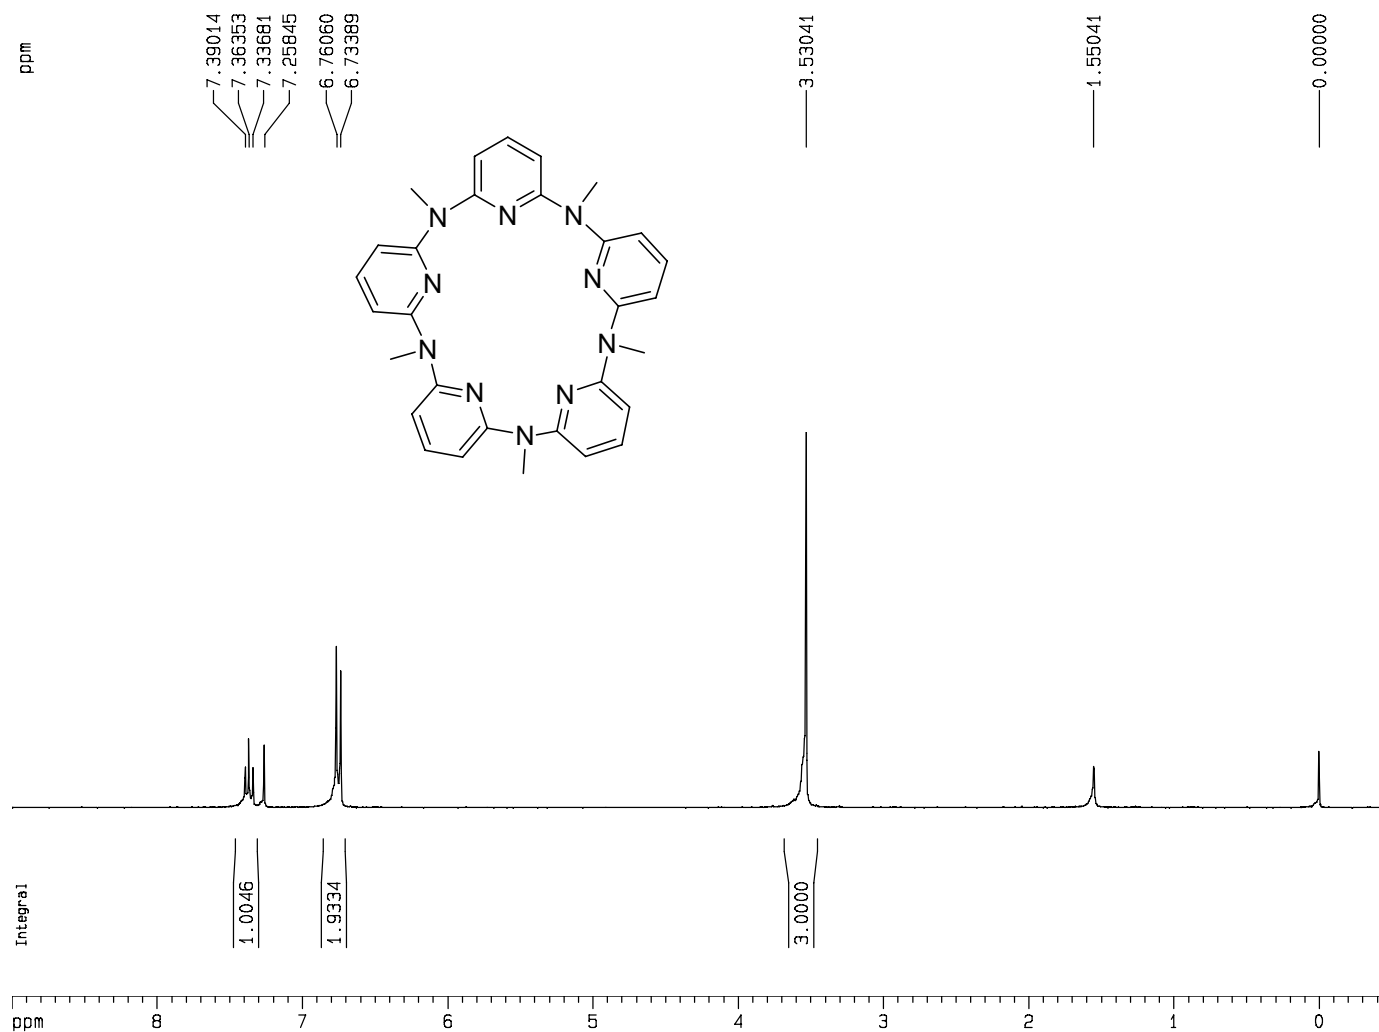

Current Data Parameters  
NAME lsqbe15  
EXPNO 20  
PROCNO 1

F2 - Acquisition Parameters  
Date\_ 20060121  
Time 21.02  
INSTRUM av300  
PROBHD 5 mm DUL 13C-1  
PULPROG zg30  
TD 65536  
SOLVENT CDCl3  
NS 5  
DS 2  
SWH 6172.839 Hz  
FIDRES 0.094190 Hz  
AQ 5.3084660 sec  
RG 406.4  
DW 81.000 usec  
DE 6.00 usec  
TE 299.3 K  
D1 2.00000000 sec

===== CHANNEL f1 =====  
NUC1 1H  
P1 9.30 usec  
PL1 -1.00 dB  
SFO1 300.1318534 MHz

F2 - Processing parameters  
SI 32768  
SF 300.1300066 MHz  
WDW EM  
SSB 0  
LB 0.30 Hz  
GB 0  
PC 1.00

1D NMR plot parameters  
CX 22.00 cm  
CY 6.00 cm  
F1P 9.000 ppm  
F1 2701.17 Hz  
F2P -0.500 ppm  
F2 -150.07 Hz  
PPMCM 0.43182 ppm/cm  
HZCM 129.60159 Hz/cm



Supplementary Material (ESI) for Chemical Communications  
This journal is (c) The Royal Society of Chemistry 2007

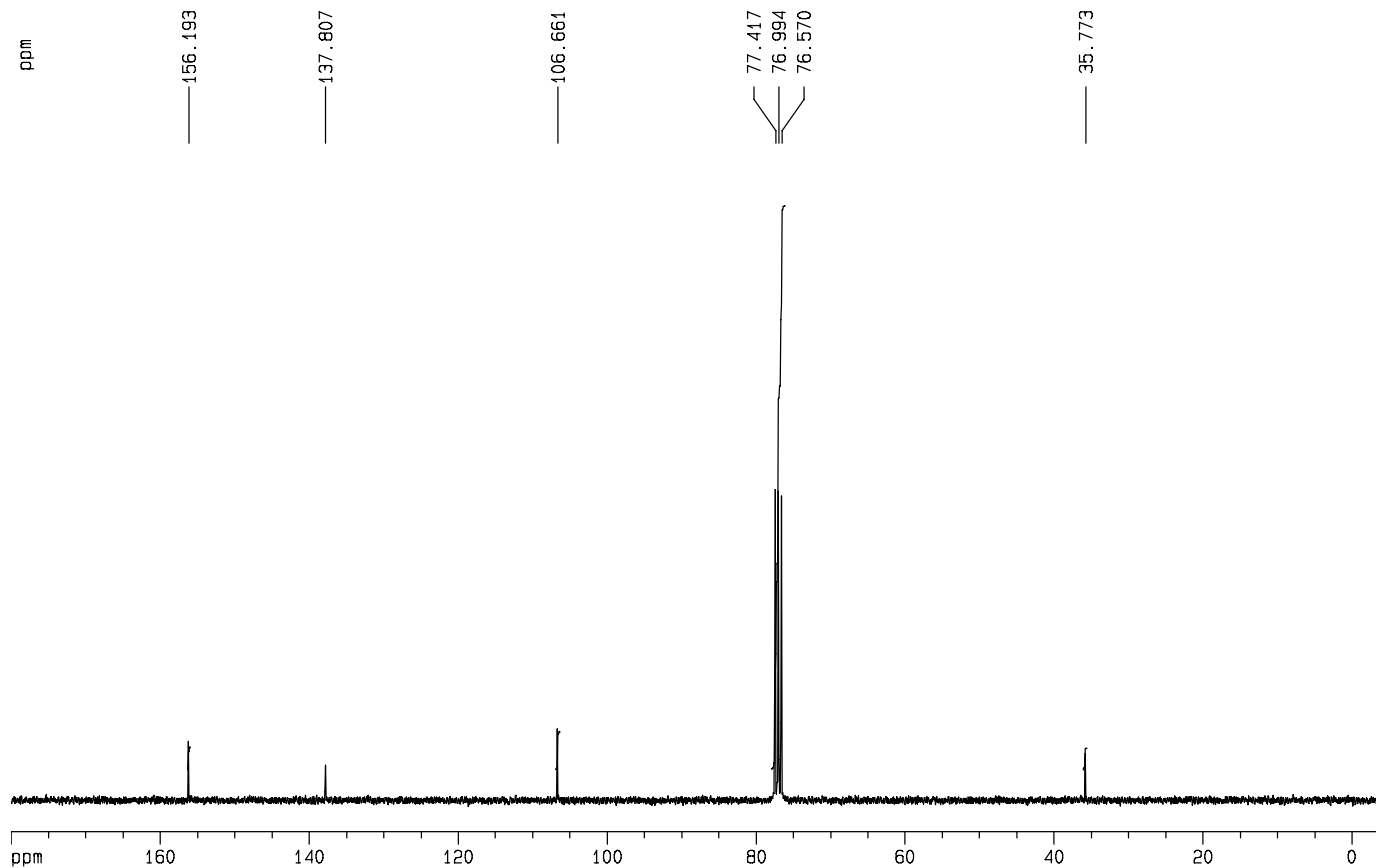

Current Data Parameters

NAME 1sqbe15  
EXPNO 21  
PROCNO 1

F2 - Acquisition Parameters

Date\_ 20060121  
Time 21.04  
INSTRUM av300  
PROBHD 5 mm DUL 13C-1  
PULPROG zgpg30  
TD 65536  
SOLVENT CDCl3  
NS 689  
DS 4  
SWH 17985.611 Hz  
FIDRES 0.274439 Hz  
AQ 1.8219508 sec  
RG 3649.1  
DW 27.800 usec  
DE 6.00 usec  
TE 299.5 K  
D1 2.0000000 sec  
d11 0.0300000 sec  
d12 0.0002000 sec

==== CHANNEL f1 =====

NUC1 13C  
P1 9.40 usec  
PL1 -1.00 dB  
SF01 75.4752953 MHz

==== CHANNEL f2 =====

CPDPRG2 waitz16  
NUC2 1H  
PCPD2 80.00 usec  
PL2 -1.00 dB  
PL12 18.00 dB  
PL13 18.00 dB  
SF02 300.1312005 MHz

F2 - Processing parameters

SI 32768  
SF 75.4677490 MHz  
NDW EM  
SSB 0  
LB 1.00 Hz  
GB 0  
PC 1.40

1D NMR plot parameters

CX 22.00 cm  
CY 5.00 cm  
F1P 180.000 ppm  
F1 13584.20 Hz  
F2P -5.000 ppm  
F2 -377.34 Hz  
PPMCM 8.40909 ppm/cm  
HZCM 634.61517 Hz/cm

Supplementary Material (ESI) for Chemical Communications  
This journal is (c) The Royal Society of Chemistry 2007

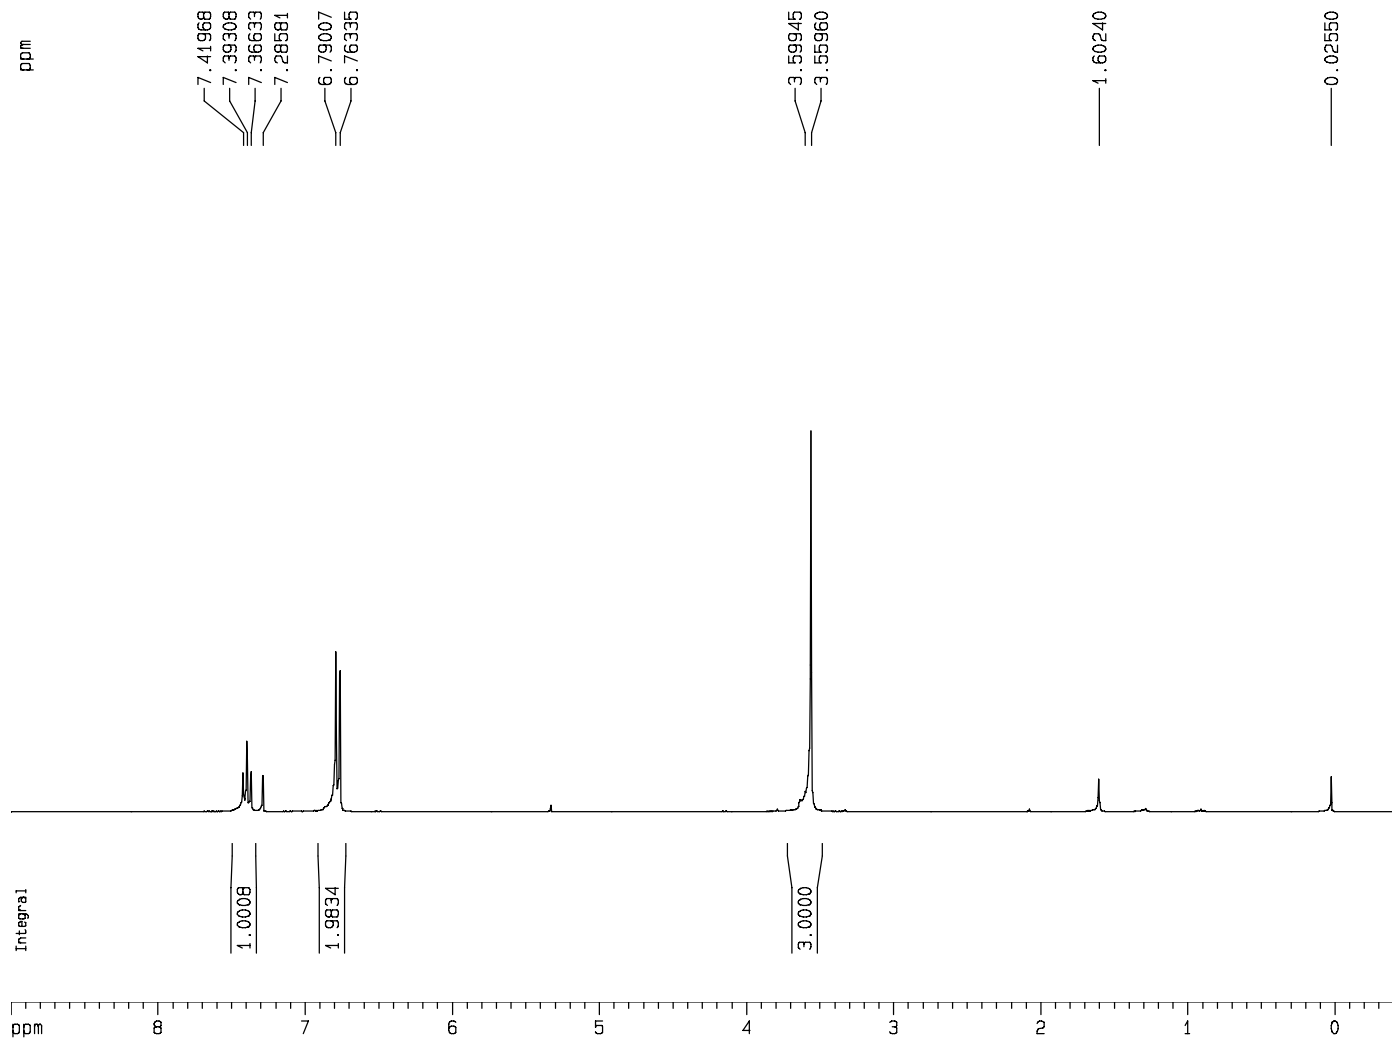

Current Data Parameters

NAME 1sq10  
EXPNO 10  
PROCNO 1

F2 - Acquisition Parameters

Date\_ 20051229  
Time 8.07  
INSTRUM av300  
PROBHD 5 mm DUL 13C-1  
PULPROG zg30  
TD 65536  
SOLVENT CDC13  
NS 8  
DS 2  
SWH 6172.839 Hz  
FIDRES 0.094190 Hz  
AQ 5.3084660 sec  
RG 322.5  
DW 81.000 usec  
DE 6.00 usec  
TE 292.4 K  
D1 2.00000000 sec

===== CHANNEL f1 =====

NUC1 1H  
P1 9.30 usec  
PL1 -1.00 dB  
SFO1 300.1318534 MHz

F2 - Processing parameters

SI 32768  
SF 300.1299982 MHz  
WDW EM  
SSB 0  
LB 0.30 Hz  
GB 0  
PC 1.00

1D NMR plot parameters

CX 22.00 cm  
CY 6.00 cm  
F1P 9.000 ppm  
F1 2701.17 Hz  
F2P -0.500 ppm  
F2 -150.07 Hz  
PPMCM 0.43182 ppm/cm  
HZCM 129.60159 Hz/cm

Supplementary Material (ESI) for Chemical Communications  
This journal is (c) The Royal Society of Chemistry 2007

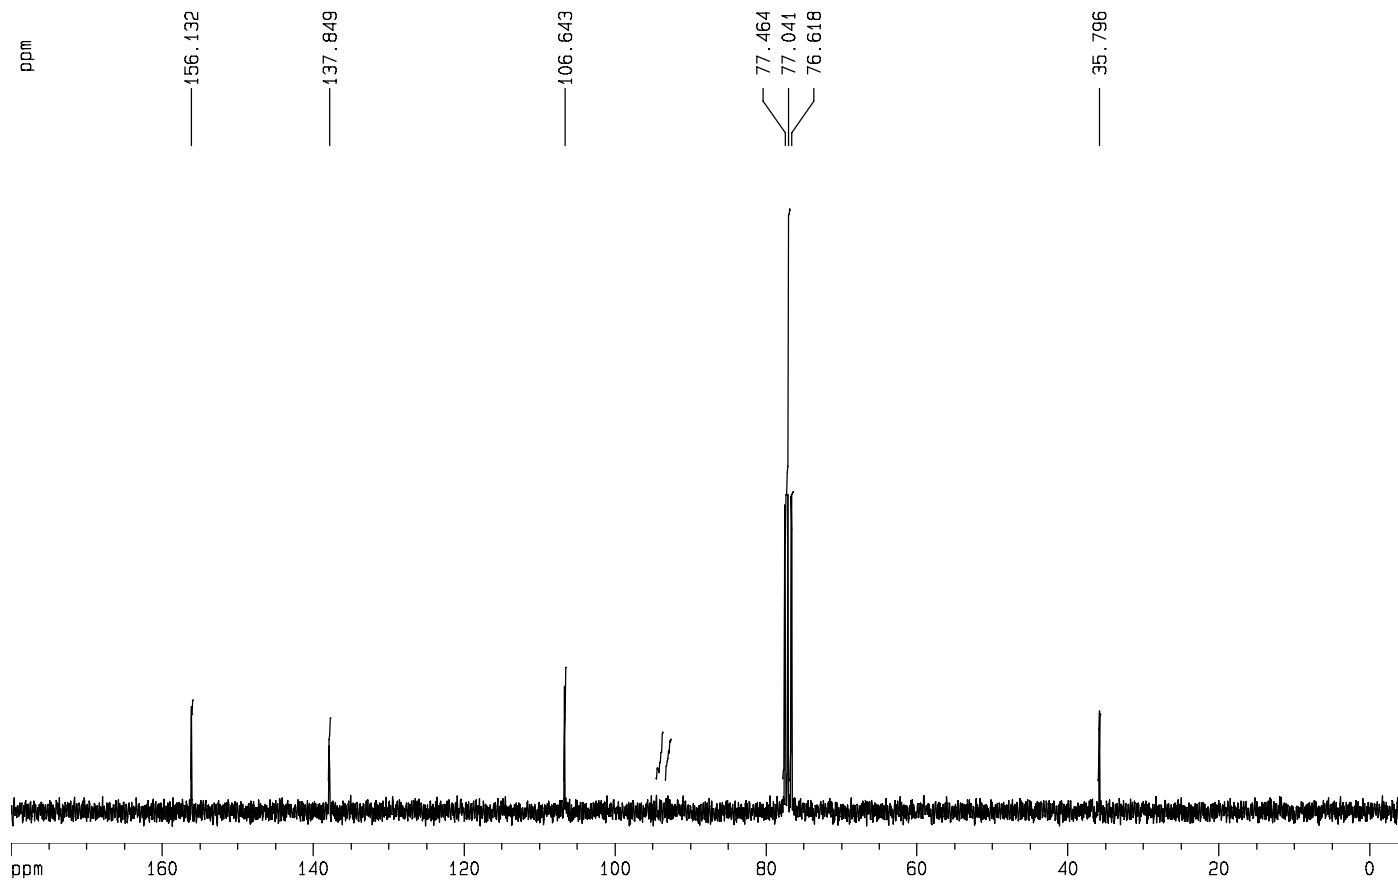

Current Data Parameters  
NAME 1sq10  
EXPNO 11  
PROCNO 1

F2 - Acquisition Parameters  
Date\_ 20051229  
Time 8.10  
INSTRUM av300  
PROBHD 5 mm DUL 13C-1  
PULPROG zgpg30  
TD 65536  
SOLVENT CDCl3  
NS 53  
DS 4  
SWH 17985.611 Hz  
FIDRES 0.274439 Hz  
AQ 1.8219508 sec  
RG 1448.2  
DW 27.800 usec  
DE 6.00 usec  
TE 292.8 K  
D1 2.00000000 sec  
d11 0.03000000 sec  
d12 0.00002000 sec

==== CHANNEL f1 =====  
NUC1 13C  
P1 9.40 usec  
PL1 -1.00 dB  
SF01 75.4752953 MHz

==== CHANNEL f2 =====  
CPOPRG2 waltz16  
NUC2 1H  
PCPD2 80.00 usec  
PL2 -1.00 dB  
PL12 18.00 dB  
PL13 18.00 dB  
SF02 300.1312005 MHz

F2 - Processing parameters  
SI 32768  
SF 75.4677490 MHz  
WDW EM  
SSB 0  
LB 1.00 Hz  
GB 0  
PC 1.40

1D NMR plot parameters  
CX 22.00 cm  
CY 5.00 cm  
F1P 180.000 ppm  
F1 13584.20 Hz  
F2P -5.000 ppm  
F2 -377.34 Hz  
PPMCM 8.40909 ppm/cm  
HZCM 634.61517 Hz/cm

Supplementary Material (ESI) for Chemical Communications  
This journal is (c) The Royal Society of Chemistry 2007

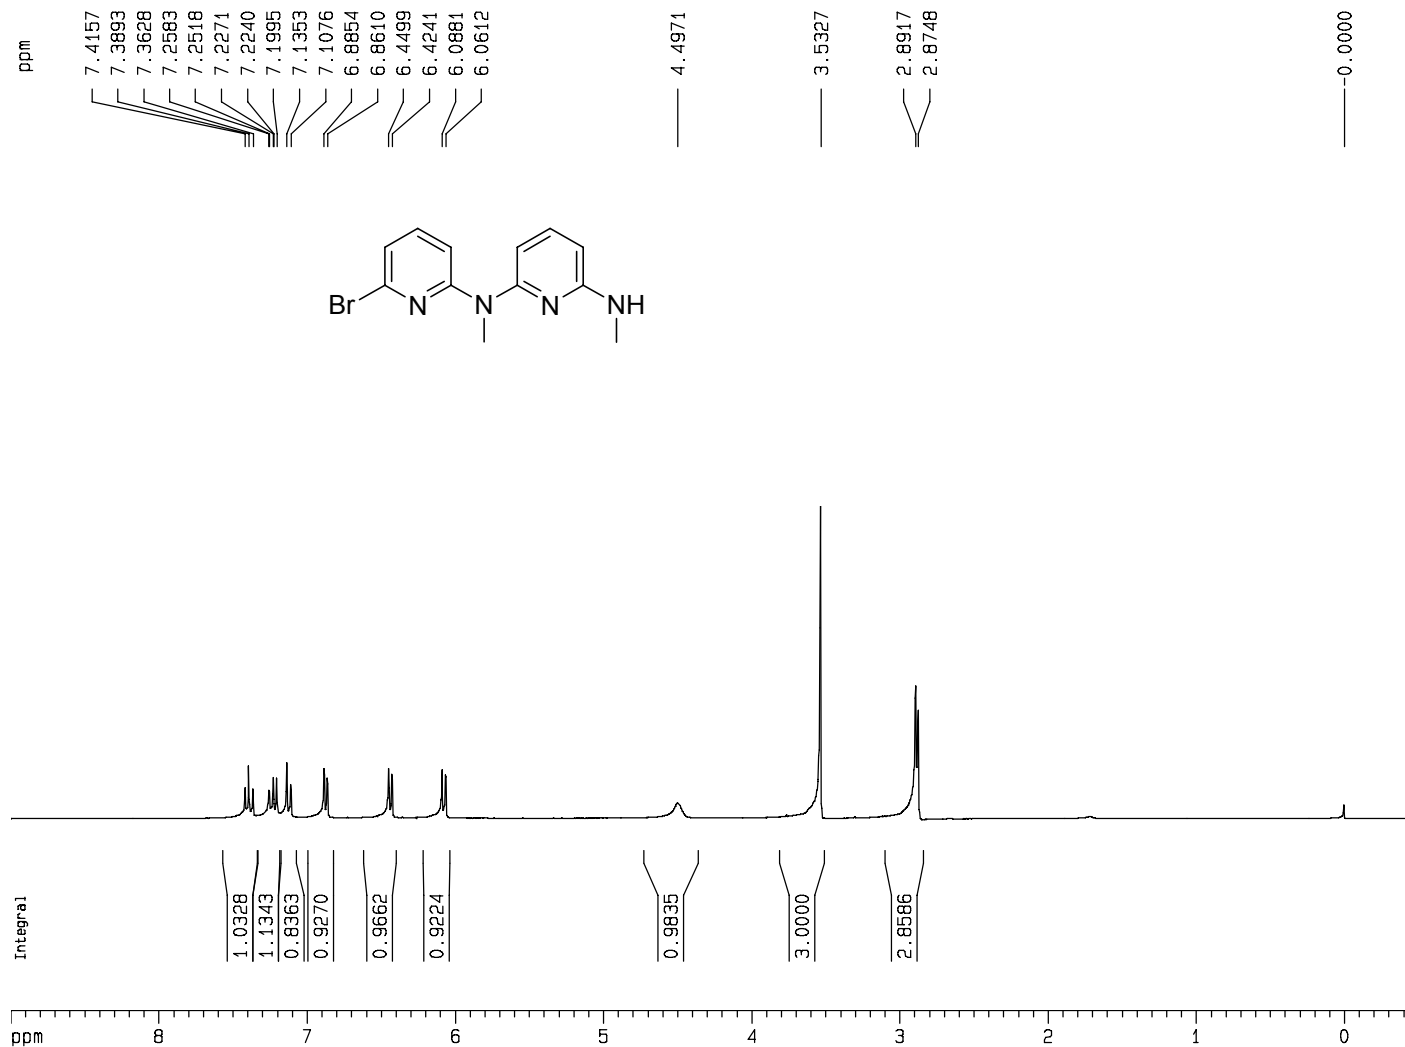

Current Data Parameters  
NAME 1sq73-26bdd1  
EXPNO 10  
PROCNO 1

F2 - Acquisition Parameters  
Date\_ 20070327  
Time 12.42  
INSTRUM av300  
PROBHD 5 mm DUL 13C-1  
PULPROG zg30  
TD 65536  
SOLVENT CDCl3  
NS 11  
DS 0  
SWH 8992.806 Hz  
FIDRES 0.137219 Hz  
AQ 3.6438515 sec  
RG 161.3  
DW 55.600 usec  
DE 6.00 usec  
TE 298.8 K  
D1 5.00000000 sec

===== CHANNEL f1 =====  
NUC1 1H  
P1 9.30 usec  
PL1 -1.00 dB  
SF01 300.1318534 MHz

F2 - Processing parameters  
SI 32768  
SF 300.1300062 MHz  
WDW EM  
SSB 0  
LB 0.35 Hz  
GB 0  
PC 1.00

1D NMR plot parameters  
CX 22.00 cm  
CY 5.00 cm  
F1P 9.000 ppm  
F1 2701.17 Hz  
F2P -0.500 ppm  
F2 -150.07 Hz  
PPMCM 0.43182 ppm/cm  
HZCM 129.60159 Hz/cm

Supplementary Material (ESI) for Chemical Communications  
This journal is (c) The Royal Society of Chemistry 2007

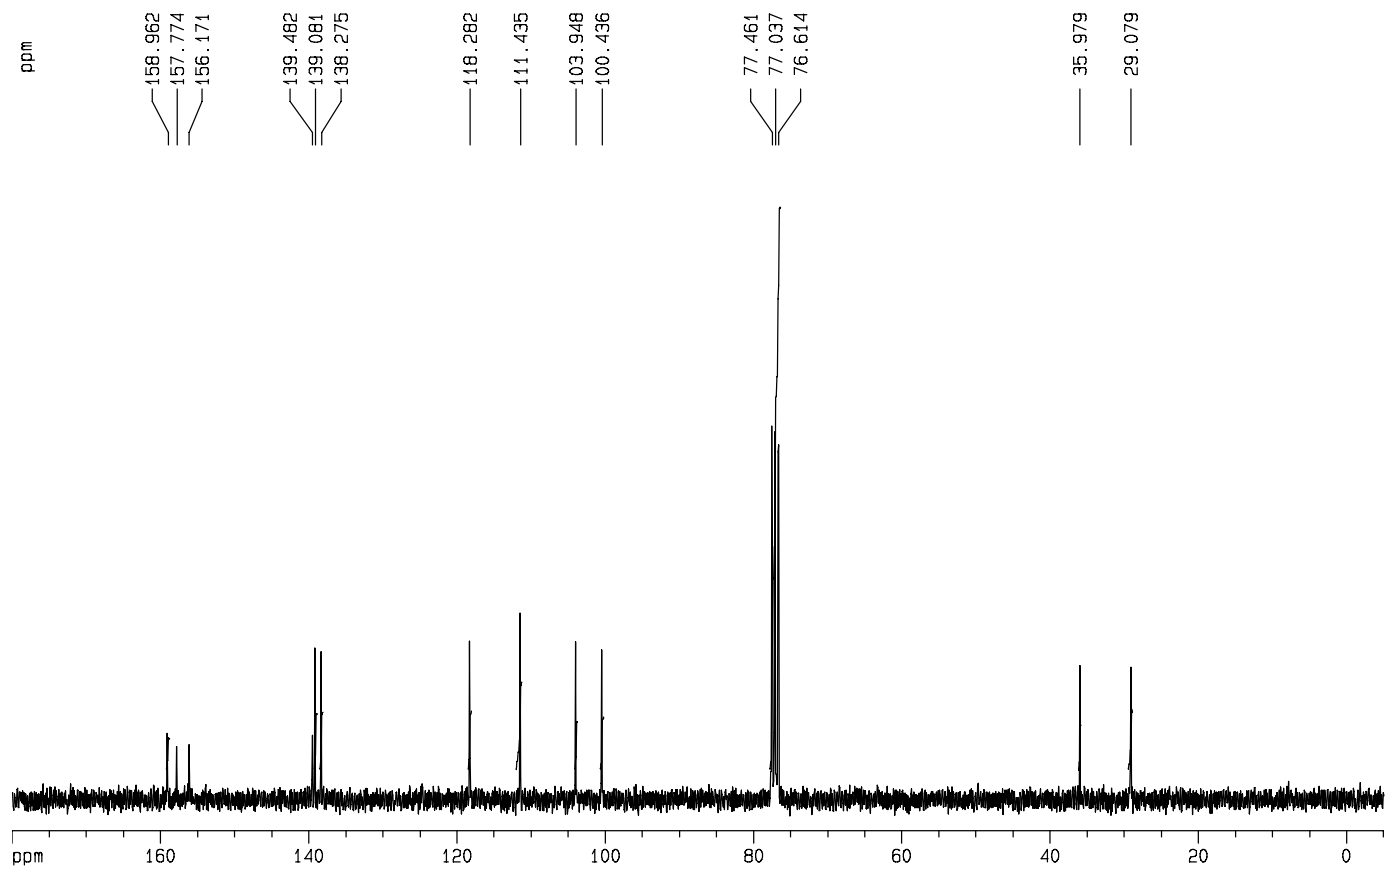

Current Data Parameters  
NAME lsq73-26b0d1  
EXPNO 11  
PROCNO 1

F2 - Acquisition Parameters  
Date\_ 20070327  
Time 12.45  
INSTRUM av300  
PROBHD 5 mm DUL 13C-1  
PULPROG zgpg30  
TD 65536  
SOLVENT CDCl3  
NS 140  
DS 4  
SWH 17985.611 Hz  
FIDRES 0.274439 Hz  
AQ 1.8219508 sec  
RG 512  
DW 27.800 usec  
DE 6.00 usec  
TE 298.7 K  
D1 2.00000000 sec  
d11 0.03000000 sec  
d12 0.00020000 sec

===== CHANNEL f1 =====  
NUC1 13C  
P1 9.40 usec  
PL1 -1.00 dB  
SF01 75.4752953 MHz

===== CHANNEL f2 =====  
CPDPRG2 waltz16  
NUC2 1H  
PCPD2 80.00 usec  
PL2 -1.00 dB  
PL12 18.00 dB  
PL13 18.00 dB  
SF02 300.1312005 MHz

F2 - Processing parameters  
SI 32768  
SF 75.4677490 MHz  
WDW EM  
SSB 0  
LB 1.00 Hz  
GB 0  
PC 1.40

1D NMR plot parameters  
CX 22.00 cm  
CY 6.00 cm  
F1P 180.000 ppm  
F1 13584.20 Hz  
F2P -5.000 ppm  
F2 -377.34 Hz  
PPMCM 8.40909 ppm/cm  
HZCM 634.61517 Hz/cm

Supplementary Material (ESI) for Chemical Communications  
This journal is (c) The Royal Society of Chemistry 2007

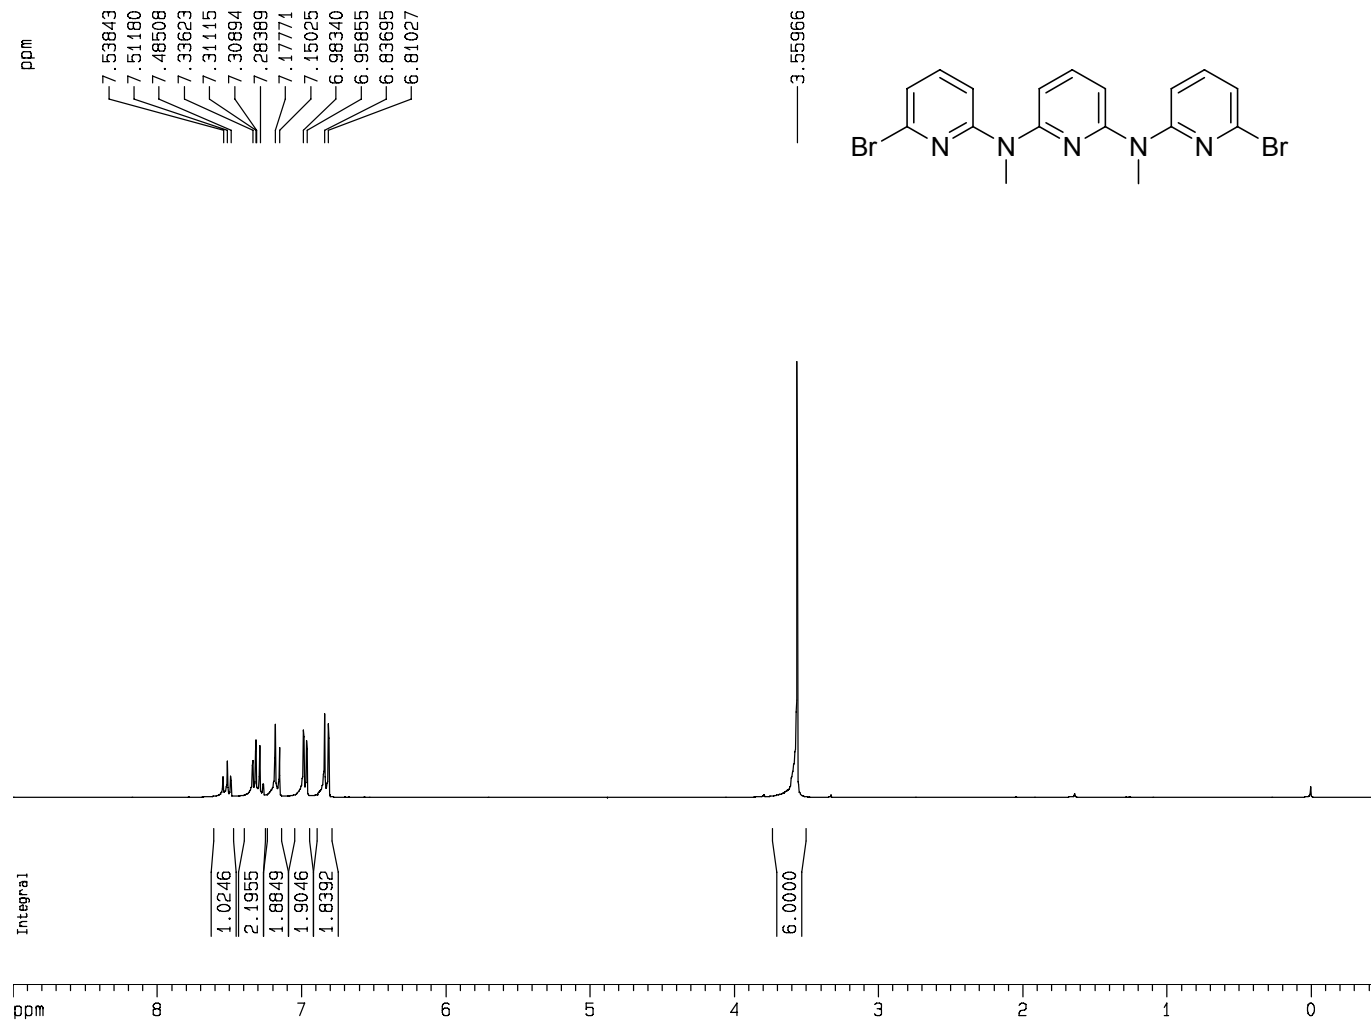

Current Data Parameters  
NAME lsq73-26bdtri  
EXPNO 10  
PROCNO 1

F2 - Acquisition Parameters  
Date\_ 20070327  
Time 12.32  
INSTRUM av300  
PROBHD 5 mm DUL 13C-1  
PULPROG zg30  
TD 65536  
SOLVENT CDCl3  
NS 5  
DS 0  
SWH 8992.806 Hz  
FIDRES 0.137219 Hz  
AQ 3.6438515 sec  
RG 143.7  
DW 55.600 usec  
DE 6.00 usec  
TE 298.0 K  
D1 5.00000000 sec

===== CHANNEL f1 =====  
NUC1 1H  
P1 9.30 usec  
PL1 -1.00 dB  
SF01 300.1318534 MHz

F2 - Processing parameters  
SI 32768  
SF 300.1300051 MHz  
WDW EM  
SSB 0  
LB 0.35 Hz  
GB 0  
PC 1.00

1D NMR plot parameters  
CX 22.00 cm  
CY 7.00 cm  
F1P 9.000 ppm  
F1 2701.17 Hz  
F2P -0.500 ppm  
F2 -150.07 Hz  
PPMCM 0.43182 ppm/cm  
HZCM 129.60159 Hz/cm

Supplementary Material (ESI) for Chemical Communications  
This journal is (c) The Royal Society of Chemistry 2007

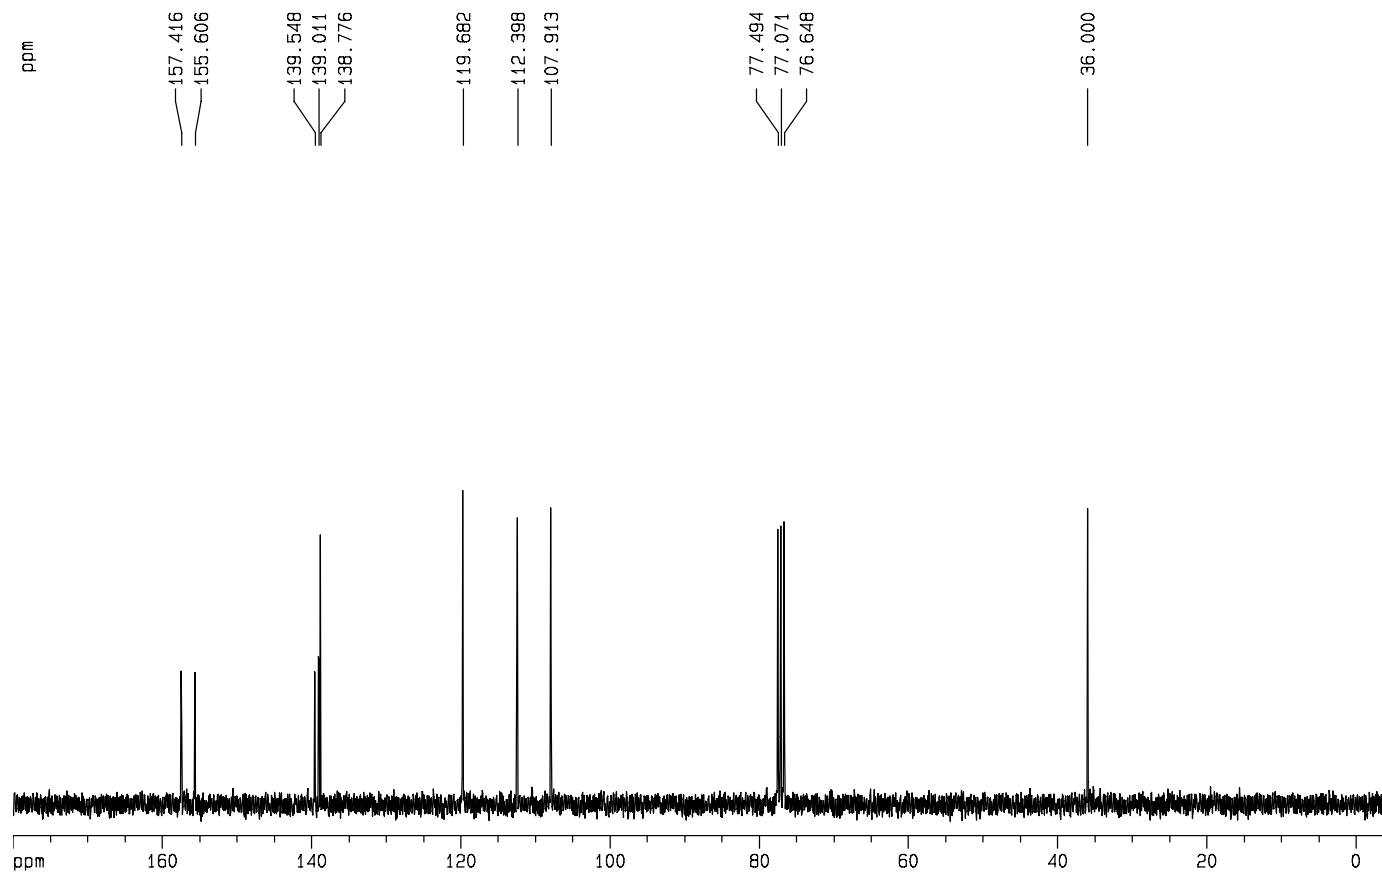

Current Data Parameters

NAME 1sq73-26bdtri  
EXPNO 11  
PROCNO 1

F2 - Acquisition Parameters

Date\_ 20070327  
Time 12.35  
INSTRUM av300  
PROBHD 5 mm DUL 13C-1  
PULPROG zgpg30  
TD 65536  
SOLVENT CDCl3  
NS 52  
DS 4  
SWH 17985.611 Hz  
FIDRES 0.274439 Hz  
AQ 1.8219508 sec  
RG 322.5  
DW 27.800 usec  
DE 6.00 usec  
TE 298.3 K  
D1 2.00000000 sec  
d11 0.03000000 sec  
d12 0.00002000 sec

===== CHANNEL f1 =====

NUC1 13C  
P1 9.40 usec  
PL1 -1.00 dB  
SFO1 75.4752953 MHz

===== CHANNEL f2 =====

CPDPRG2 waltz16  
NUC2 1H  
PCPD2 80.00 usec  
PL2 -1.00 dB  
PL12 18.00 dB  
PL13 18.00 dB  
SFO2 300.1312005 MHz

F2 - Processing parameters

SI 32768  
SF 75.4677490 MHz  
WDW EM  
SSB 0  
LB 1.00 Hz  
GB 0  
PC 1.40

1D NMR plot parameters

CX 22.00 cm  
CY 5.00 cm  
F1P 180.000 ppm  
F1 13584.20 Hz  
F2P -5.000 ppm  
F2 -377.34 Hz  
PPMCM 8.40909 ppm/cm  
HZCM 634.61517 Hz/cm
